# Supplementary material for: The Effect of Lameness on Milk Production of Dairy Goats
Source: MDPI journal article supplement (doi:10.3390/ani13111728), 2023-05-23
Supplement: s1 [file s1]

## Supplementary Table

**Table S1.** Locomotion scoring strategy used to measure lameness in dairy goats (adapted from Deeming et al. 2018 [26]).

| Severity Score | Label           | Clinically Lamé | Limping | Gait Description                                                                                                                                                                           | Modifications                                                                                              |
|----------------|-----------------|-----------------|---------|--------------------------------------------------------------------------------------------------------------------------------------------------------------------------------------------|------------------------------------------------------------------------------------------------------------|
| 0              | Normal/not lame | No              | No      | Moving forward with even strides where hooves track up. Weight-bearing and no apparent head nodding.                                                                                       |                                                                                                            |
| 1              | Uneven gait     | No              | Uneven  | Moving forward with shorter strides where hooves do not track up. Weight-bearing, and having an absent head nodding, however, have joints that may show stiffness.                         |                                                                                                            |
| 2              | Mildly lame     | No              | Yes     | Moving forward with shorter strides where hooves do not track up. One or more legs/feet may be affected. Weight-bearing, and having an absent head nodding, however, may show a mild limp. |                                                                                                            |
| 3              | Moderately lame | Yes             | Yes     | Reluctant to move forward and may display a moderate limp. One or more legs could be affected and may display some goose-stepping.                                                         |                                                                                                            |
| 4              | Severely lame   | Yes             | Yes     | Refusal to bear any weight on one foot. Severe limping or extreme goose-stepping or walking on the knees.                                                                                  | If there is no limp, but are very reluctant to move forward and weight-bear due to multiple feet involved. |
